# Supplementary material
Source: publisher figshare collection journal article supplement (https://gsapubs.figshare.com/ndownloader/files/23392826)
Supplement: Supplementary file 1 [file 23392826]

## Sheet: GPS
Sample	Latitude	Longitude
AL-S3	32.9836	-115.133
AL-S7	32.768	-114.891
AL-S8 (Abrasion sample location)	33.149	-115.313
LS-S1 (Abrasion sample location)	36.5596	-98.8988
LS-S4	36.5501	-98.8951
LS-S5	36.5368	-98.8817

## Sheet: G47282
Adams, S.M., and Soreghan, G.S., 2020, A test of the efficacy of sand saltation for silt production: Implications for the interpretation of loess: Geology, v. 48, https://doi.org/10.1130/G47282.1
